# Supplementary material for: Insights into the Functional Roles of N-Terminal and C-Terminal Domains of Helicobacter pylori DprA
Source: PubMed Central journal article supplement (PMC4489622; doi:10.1371/journal.pone.0131116), 2015-07-02
Supplement: pone.0131116.s001.pdf [file pone.0131116.s001.pdf]

**Fig. A: Purification and mass characterization of HpRF and HpDML1** (A) 0.1% SDS – 10% PAGE of purified recombinant HpRF - (His)<sub>6</sub>. M: molecular mass standards. Lane 1: Purified HpRF- (His)<sub>6</sub> protein. (B) 0.1% SDS – 10% PAGE of purified recombinant HpDML1 - (His)<sub>6</sub>. M: molecular mass standards. Lane 1: Purified HpDML1- (His)<sub>6</sub> protein. (C) Mass spectra of purified HpRF - (His)<sub>6</sub>. Three sharp peaks corresponding to molecular mass of HpRF – (His)<sub>6</sub> (1) 26.5 kDa (monocharged species) (2) 13.27 kDa (dicharged species) and (3) 8.85 kDa (tricharged species) are obtained (D) Mass spectra of purified HpDML1. A sharp peak corresponding to molecular mass of HpDML1 – (His)<sub>6</sub> (1) 9.589 kDa is obtained. (E) Circular dichroism spectra of HpDprA, HpRF and HpDML1. Full length HpDprA, HpRF or HpDML1 (100 µg/ ml) were used to record the spectra in 1X PBS buffer. The spectra were recorded in the wavelength range 190 - 300 nm in a Jasco J- 500A spectropolarimeter. A subset of spectra for wavelength range 200 nm to 300 nm is shown here. All measurements were recorded at 25°C. Spectra presented are representative of three independent experiments.

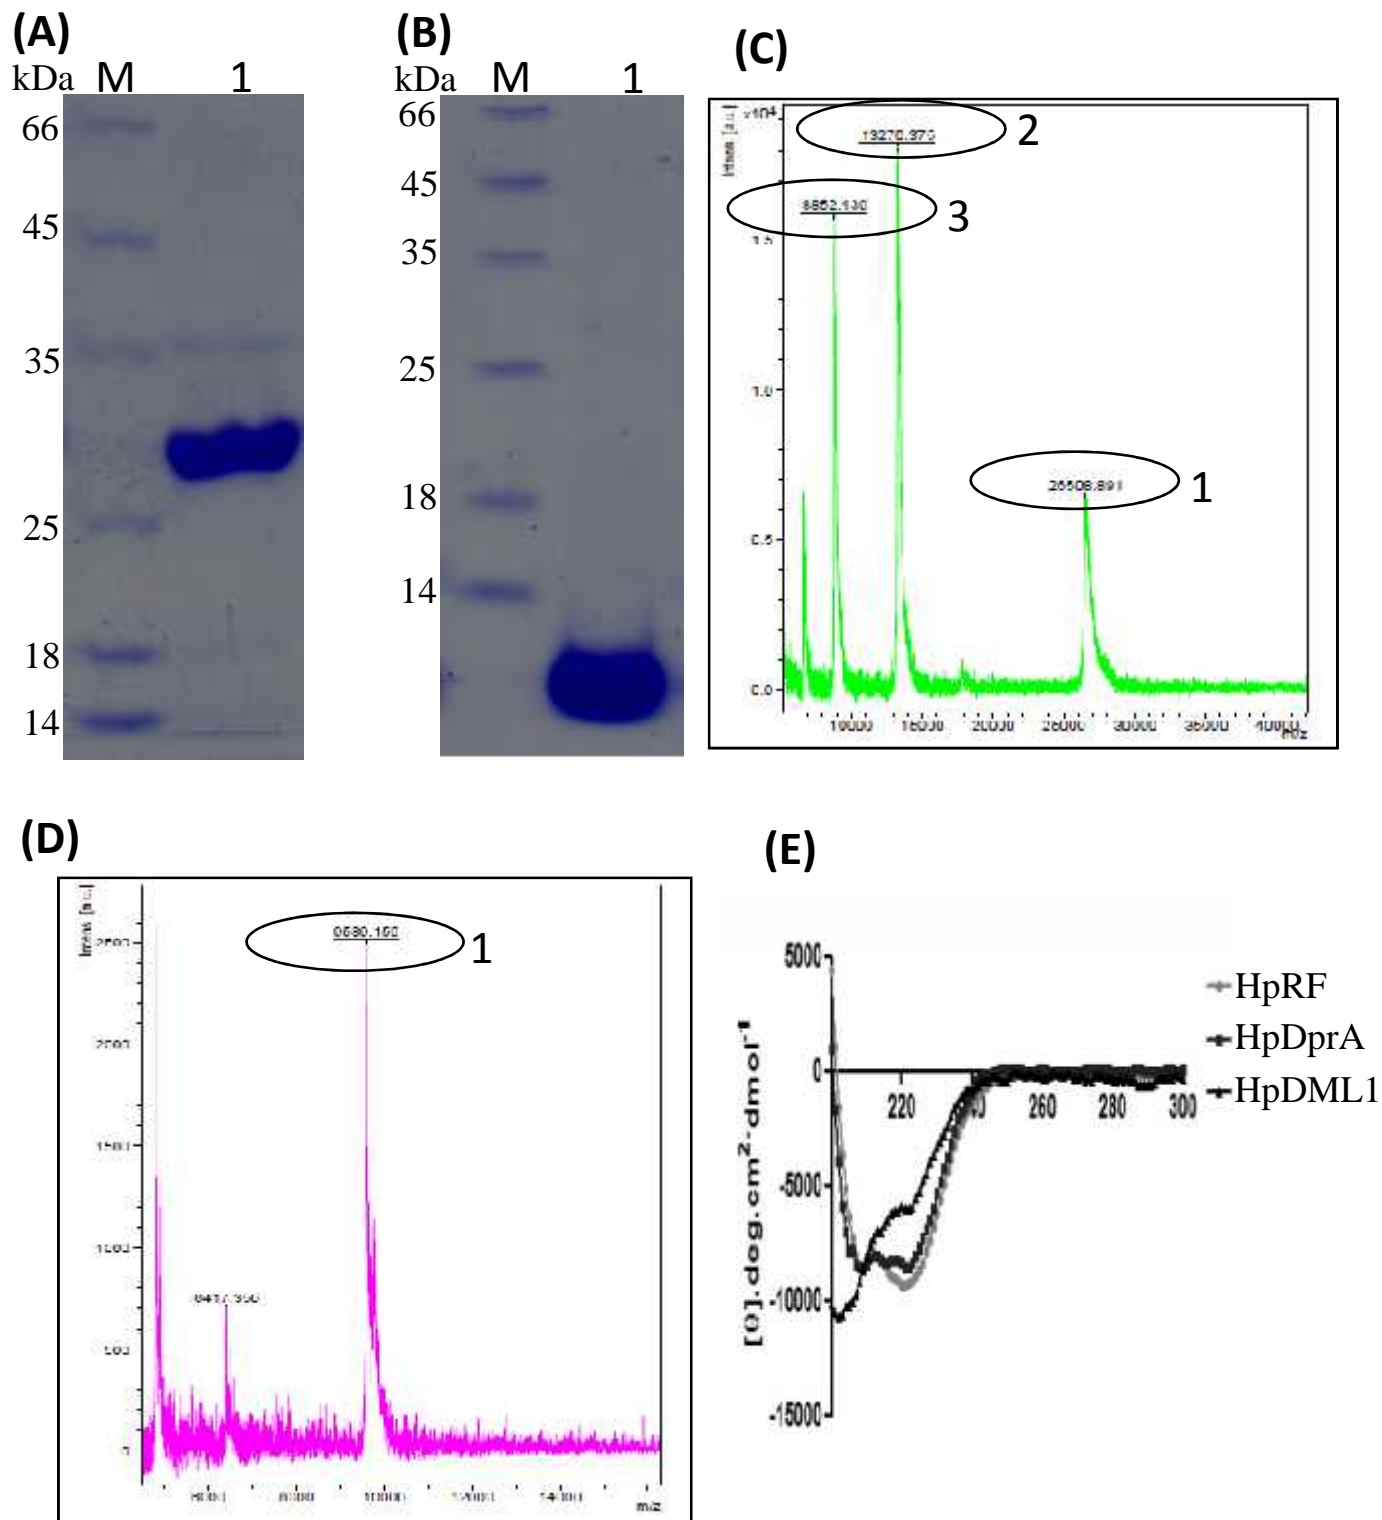

Fig. 1

**Fig. B: Crosslinking of HpDprA, HpRF and HpDML1 using gluteraldehyde.** 5  $\mu$ M of HpDprA (A) or 6  $\mu$ M HpRF (B) was incubated with (lanes 2 to 5: (left to right) 0.01, 0.05, 0.1, 0.5%) gluteraldehyde at 4°C for 10 minutes. (C) 140  $\mu$ M of HpDML1 was incubated with (lanes 2 to 5: (left to right) 0.1, 0.5, 1, 2%) gluteraldehyde at 4°C for 30 minutes. Lane 1 is protein alone. Lane 6 shows standard protein marker. 1.5  $\mu$ g of protein was loaded per well. Reaction mixtures were analyzed by SDS-PAGE and visualized by silver staining.

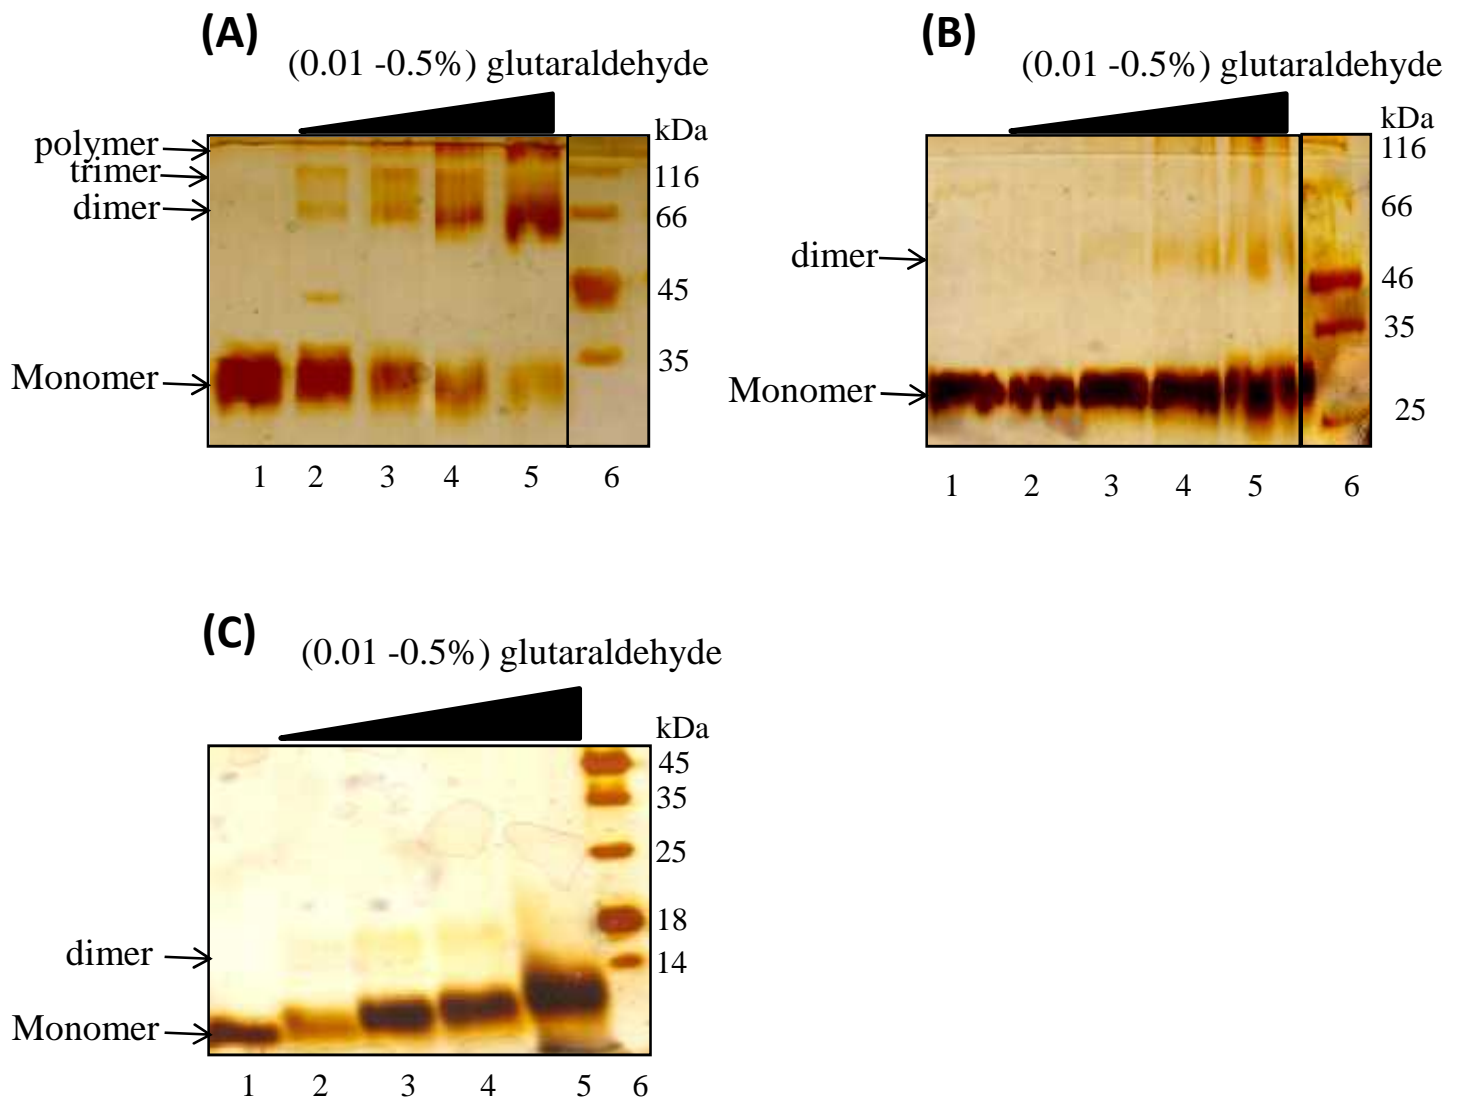

Fig. 2

**Fig. C: Purification and CD spectroscopy of HpDprAR<sub>48A/R49A</sub> and HpDprAR<sub>48A/R49A/K133A</sub>**  
(A) 0.1% SDS – 10% PAGE analysis of purified recombinant wtDprA and mutants. M: molecular mass standards. Lane1: wild type, lane2: HpDprAR<sub>48A/R49A</sub>, lane3: HpDprAR<sub>48A/R49A/K133A</sub> (B) An overlay of Far – UV circular dichroism spectra of HpDprA, double and triple mutants. The spectra were taken in phosphate buffered saline in a wavelength range 190 -300 nm. A subset of spectra from 200 to 250 nm wavelength range is shown here. The observed two minima at 222 nm and 209 nm are characteristic of  $\alpha$  – helix spectrum.

**(A)**

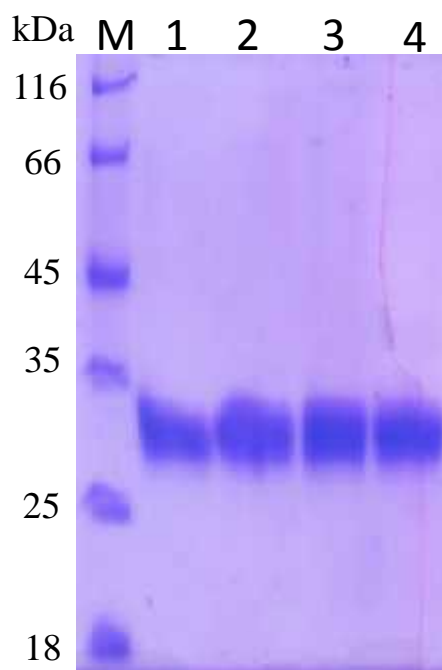

**(B)**

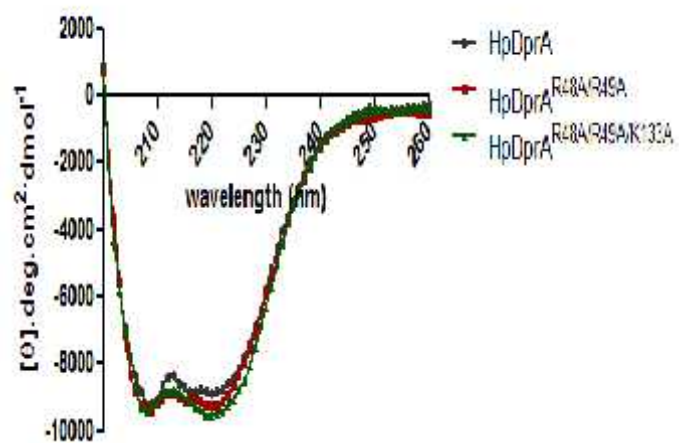

Fig. 3
